# Supplementary material
Source: PubMed Central journal article supplement (PMC7512123)
Supplement: jamasurg-e203336-s002.pdf [file jamasurg-e203336-s002.pdf]

## Supplementary Online Content

Berardi G, Antonelli G, Colasanti M, et al. Association of sarcopenia and body composition with short-term outcomes after liver resection for malignant tumors. *JAMA Surg*. Published online September 23, 2020. doi:10.1001/jamasurg.2020.3336

**eTable.** Logistic Regression for Predictive Factors of Morbidity

This supplementary material has been provided by the authors to give readers additional information about their work.

**eTable.** Logistic Regression for Predictive Factors of Morbidity

|                                                 | <i>Univariate analysis</i> |                  | <i>Multivariate analysis*</i> |                  |
|-------------------------------------------------|----------------------------|------------------|-------------------------------|------------------|
|                                                 | <i>HR (95% CI)</i>         | <i>P value</i>   | <i>HR (95% CI)</i>            | <i>P value</i>   |
| <b>Age (years)</b>                              | 1.02 (0.99-1.04)           | 0.07             |                               |                  |
| <b>ASA score</b>                                | 3.57 (1.70-7.51)           | <b>0.001</b>     | 1.88 (0.60-5.88)              | 0.27             |
| <b>Comorbidities</b>                            | 1.65 (0.86-3.16)           | 0.12             |                               |                  |
| <b>BMI (Kg/m<sup>2</sup>)</b>                   | 1.97 (0.91-2.04)           | 0.43             |                               |                  |
| <b>Skeletal Muscle Index (cm/m<sup>2</sup>)</b> | 0.94 (0.91-0.97)           | <b>&lt;0.001</b> | 0.96 (0.91-1.01)              | 0.16             |
| <b>Visceral adipose tissue (cm<sup>2</sup>)</b> | 0.99 (0.99-1.00)           | 0.70             |                               |                  |
| <b>Tricipital skinfold (mm)</b>                 | 1.00 (0.97-1.04)           | 0.76             |                               |                  |
| <b>Subscapular skinfold (mm)</b>                | 0.95 (0.91-1.00)           | 0.06             |                               |                  |
| <b>Handgrip strength (Kg)</b>                   | 0.92 (0.89-0.96)           | <b>&lt;0.001</b> | 1.06 (0.98-1.15)              | 0.13             |
| <b>Gait speed (m/s)</b>                         | 0.91 (.68-1.21)            | 0.53             |                               |                  |
| <b>Normal Muscle Mass and Strength</b>          |                            | 1.00             |                               | 1.00             |
| <b>Reduced Muscle Strength</b>                  | 1.15 (1.11-4.22)           | <b>0.008</b>     | 1.22 (0.91-3.91)              | 0.82             |
| <b>Reduced Muscle Mass</b>                      | 2.25 (1.32-5.93)           | <b>0.009</b>     | 1.92 (1.23-4.12)              | <b>0.003</b>     |
| <b>Reduced Muscle Mass and Strength</b>         | 4.22 (1.42-15.43)          | <b>&lt;0.001</b> | 3.92 (1.96-7.80)              | <b>&lt;0.001</b> |
| <b>Cirrhosis</b>                                | 2.11 (1.19-3.75)           | <b>0.01</b>      | 3.63 (1.44-9.15)              | <b>0.006</b>     |
| <b>Portal hypertension</b>                      | 4.57 (2.01-10.40)          | <b>&lt;0.001</b> | 5.88 (1.83-18.89)             | <b>0.003</b>     |
| <b>Neoadjuvant chemotherapy</b>                 | 1.35 (0.68-2.68)           | 0.37             |                               |                  |
| <b>Open approach</b>                            | 2.23 (1.02-4.90)           | <b>0.04</b>      | 1.85 (0.58-5.85)              | 0.29             |
| <b>Major hepatectomy</b>                        | 2.42 (1.32-4.45)           | <b>0.004</b>     | 2.12 (0.77-4.54)              | 0.33             |
| <b>Biliary reconstruction</b>                   | 5.57 (2.00-15.55)          | <b>0.001</b>     | 6.00 (1.60-22.43)             | <b>0.008</b>     |
| <b>Blood loss</b>                               | 1.00 (1.00-1.00)           | <b>&lt;0.001</b> | 1.00 (0.99-1.00)              | 0.22             |
| <b>Operative time</b>                           | 1.01 (1.00-1.01)           | <b>&lt;0.001</b> | 1.00 (0.99-1.01)              | 0.07             |

ASA, American Society of Anaesthesiology. BMI, Body Mass Index
